# Supplementary material for: Interventions to reduce post-traumatic stress disorder symptoms in health care professionals from 2011 to 2021: a scoping review
Source: HighWire-hosted journal article supplement (doi:10.1136/bmjopen-2021-058214), 2022-01-01
Supplement: bmjopen-2021-058214supp001_data_supplement.pdf [file bmjopen-2021-058214supp001_data_supplement.pdf]

**Supplementary File 1** Search strategies of each database (2011-2021)

| Database | Search Strategy                                                                                                                                                                                                                                                                                                                                                                                                                                                                                                                                                                                                                                                                                                                                                                                                                                                                                                                                                                                                                                                                                                                                                                                                                                                                                    | Literature |
|----------|----------------------------------------------------------------------------------------------------------------------------------------------------------------------------------------------------------------------------------------------------------------------------------------------------------------------------------------------------------------------------------------------------------------------------------------------------------------------------------------------------------------------------------------------------------------------------------------------------------------------------------------------------------------------------------------------------------------------------------------------------------------------------------------------------------------------------------------------------------------------------------------------------------------------------------------------------------------------------------------------------------------------------------------------------------------------------------------------------------------------------------------------------------------------------------------------------------------------------------------------------------------------------------------------------|------------|
| PubMed   | <p>19 (((((((("Nurses"[Mesh]) OR ("Nurse Midwives"[Mesh])) OR ("Physicians"[Mesh])) OR ("Health Personnel"[Mesh])) OR ("Nurse Practitioners"[Mesh])) OR (nurs*[Title] OR midwi*[Title] OR nurse practitioners[Title] OR doctor*[Title] OR clinician*[Title] OR physician*[Title] OR healthcare workers[Title] OR healthcare professionals[Title] OR healthcare providers[Title] OR health personnel[Title] OR medical staff[Title] OR medical practitioner[Title] OR medical care personnel[Title])) AND (((("Mindfulness"[Mesh]) OR ("Resilience, Psychological"[Mesh])) OR ("Cognitive Behavioral Therapy"[Mesh])) OR (intervention*[Title] OR program*[Title] OR training[Title] OR psychoeducation[Title] OR mindful*[Title] OR resilienc*[Title] OR cognitive behavioral[Title]))) AND (("Stress Disorders, Post-Traumatic"[Mesh]) OR (post-traumatic stress disorder[Title/Abstract] OR PTSD[Title/Abstract]))</p> <p>18 ("Stress Disorders, Post-Traumatic"[Mesh]) OR (post-traumatic stress disorder[Title/Abstract] OR PTSD[Title/Abstract])</p> <p>17 post-traumatic stress disorder[Title/Abstract] OR PTSD[Title/Abstract]</p> <p>16 "Stress Disorders, Post-Traumatic"[Mesh]</p> <p>15 (((("Mindfulness"[Mesh]) OR ("Resilience, Psychological"[Mesh])) OR ("Cognitive Behavioral</p> | 196        |

|    |                                                                                                                                                                                                                                                                                                                                                                                                                                                                                             |  |
|----|---------------------------------------------------------------------------------------------------------------------------------------------------------------------------------------------------------------------------------------------------------------------------------------------------------------------------------------------------------------------------------------------------------------------------------------------------------------------------------------------|--|
|    | Therapy"[Mesh])) OR (intervention*[Title] OR program*[Title] OR training[Title] OR psychoeducation[Title] OR mindful*[Title] OR resilienc*[Title] OR cognitive behavioral[Title])                                                                                                                                                                                                                                                                                                           |  |
| 14 | intervention*[Title] OR program*[Title] OR training[Title] OR psychoeducation[Title] OR mindful*[Title] OR resilienc*[Title] OR cognitive behavioral[Title]                                                                                                                                                                                                                                                                                                                                 |  |
| 13 | "Cognitive Behavioral Therapy"[Mesh]                                                                                                                                                                                                                                                                                                                                                                                                                                                        |  |
| 12 | "Resilience, Psychological"[Mesh]                                                                                                                                                                                                                                                                                                                                                                                                                                                           |  |
| 10 | "Mindfulness"[Mesh]                                                                                                                                                                                                                                                                                                                                                                                                                                                                         |  |
| 9  | (((((("Nurses"[Mesh]) OR ("Nurse Midwives"[Mesh])) OR ("Physicians"[Mesh])) OR ("Health Personnel"[Mesh])) OR ("Nurse Practitioners"[Mesh])) OR (nurs*[Title] OR midwi*[Title] OR nurse practitioners[Title] OR doctor*[Title] OR clinician*[Title] OR physician*[Title] OR healthcare workers[Title] OR healthcare professionals[Title] OR healthcare providers[Title] OR health personnel[Title] OR medical staff[Title] OR medical practitioner[Title] OR medical care personnel[Title]) |  |
| 8  | nurs*[Title] OR midwi*[Title] OR nurse practitioners[Title] OR doctor*[Title] OR clinician*[Title] OR physician*[Title] OR healthcare workers[Title] OR healthcare professionals[Title] OR healthcare providers[Title] OR health personnel[Title] OR medical staff[Title] OR medical practitioner[Title] OR medical care personnel[Title]                                                                                                                                                   |  |
| 7  | "Nurse Practitioners"[Mesh]                                                                                                                                                                                                                                                                                                                                                                                                                                                                 |  |
| 6  | "Health Personnel"[Mesh]                                                                                                                                                                                                                                                                                                                                                                                                                                                                    |  |

|        |                                                                                                                                                                                                                                                                                                                                                                                                                                                                                                                                                                                                                                                                                                                                                                                                                                                                                                                                                                                                                          |      |
|--------|--------------------------------------------------------------------------------------------------------------------------------------------------------------------------------------------------------------------------------------------------------------------------------------------------------------------------------------------------------------------------------------------------------------------------------------------------------------------------------------------------------------------------------------------------------------------------------------------------------------------------------------------------------------------------------------------------------------------------------------------------------------------------------------------------------------------------------------------------------------------------------------------------------------------------------------------------------------------------------------------------------------------------|------|
|        | <p>5 "Physicians"[Mesh]</p> <p>3 "Nurse Midwives"[Mesh]</p> <p>1 "Nurses"[Mesh]</p>                                                                                                                                                                                                                                                                                                                                                                                                                                                                                                                                                                                                                                                                                                                                                                                                                                                                                                                                      |      |
| EMBASE | <p>#34. #21 AND #30 AND #33</p> <p>#33. #31 OR #32</p> <p>#32. 'post-traumatic stress disorder' OR 'ptsd':ab</p> <p>#31. 'posttraumatic stress disorder'/exp</p> <p>#30. #22 OR #23 OR #24 OR #25 OR #26 OR #27 OR #28 OR #29</p> <p>#29. 'intervention*' OR 'program*' OR 'training' OR 'psychoeducation' OR 'mindful*' OR 'resilienc*' OR 'cognitive behavioral':ti</p> <p>#28. 'cognitive behavioral therapy'/exp</p> <p>#27. 'resilience'/exp</p> <p>#26. 'mindfulness'/exp</p> <p>#25. 'psychoeducation'/exp</p> <p>#24. 'training'/exp</p> <p>#23. 'program'/exp</p> <p>#22. 'intervention'/exp</p> <p>#21. #1 OR #2 OR #3 OR #4 OR #5 OR #6 OR #7 OR #8 OR #9 OR #10 OR #11 OR #12 OR #13 OR #14 OR #15 OR #16 OR #17 OR #18 OR #19 OR #20</p> <p>#20. 'medical care personnel':ti</p> <p>#19. 'medical practitioner':ti</p> <p>#18. 'medical staff':ti</p> <p>#17. 'health personnel':ti</p> <p>#16. 'healthcare providers':ti</p> <p>#15. 'healthcare professionals':ti</p> <p>#14. 'healthcare workers':ti</p> | 2043 |

|                                                  |                                                                                                                                                                                                                                                                                                                                                                                                                                                                                                                                                                                                                                                                                                                                                                                                                                                      |    |
|--------------------------------------------------|------------------------------------------------------------------------------------------------------------------------------------------------------------------------------------------------------------------------------------------------------------------------------------------------------------------------------------------------------------------------------------------------------------------------------------------------------------------------------------------------------------------------------------------------------------------------------------------------------------------------------------------------------------------------------------------------------------------------------------------------------------------------------------------------------------------------------------------------------|----|
|                                                  | <p>#13. 'clinician*':ti</p> <p>#12. 'clinician*':ti</p> <p>#11. 'clinician'/exp</p> <p>#10. 'doctor*':ti</p> <p>#9. 'nurse practitioners':ti</p> <p>#8. 'midwi*':ti</p> <p>#7. 'nurs*':ti</p> <p>#6. 'medical staff'/exp</p> <p>#5. 'health care personnel'/exp</p> <p>#4. 'physician'/exp</p> <p>#3. 'nurse practitioner'/exp</p> <p>#2. 'midwife'/exp</p> <p>#1. 'nurse'/exp</p>                                                                                                                                                                                                                                                                                                                                                                                                                                                                   |    |
| Cochrane Library<br>(CENTRAL trials<br>database) | <p>#1 MeSH descriptor: [Nurses] explode all trees</p> <p>#2 MeSH descriptor: [Nurse Midwives] explode all trees</p> <p>#3 MeSH descriptor: [Nurse Practitioners] explode all trees</p> <p>#4 MeSH descriptor: [Physicians] explode all trees</p> <p>#5 MeSH descriptor: [Health Personnel] explode all trees</p> <p>#6 MeSH descriptor: [Medical Staff] explode all trees</p> <p>#7 (nurs* OR midwi* OR nurse practitioners OR doctor* OR clinician* OR physician* OR healthcare workers OR healthcare professionals OR healthcare providers OR health personnel OR medical staff OR medical practitioner OR medical care personnel):ti (Word variations have been searched)</p> <p>#8 #1 OR #2 OR #3 OR #4 OR #5 OR #6 OR #7</p> <p>#9 MeSH descriptor: [Program] explode all trees</p> <p>#10 MeSH descriptor: [Mindfulness] explode all trees</p> | 37 |

|          |                                                                                                                                                                                                                                                                                                                                                                                                                                                                                                                                                                                                         |    |
|----------|---------------------------------------------------------------------------------------------------------------------------------------------------------------------------------------------------------------------------------------------------------------------------------------------------------------------------------------------------------------------------------------------------------------------------------------------------------------------------------------------------------------------------------------------------------------------------------------------------------|----|
|          | <p>#11 MeSH descriptor: [Resilience, Psychological] explode all trees</p> <p>#12 MeSH descriptor: [Cognitive Behavioral Therapy] explode all trees</p> <p>#13 (intervention* OR program* OR training OR psychoeducation OR mindful* OR resilienc* OR cognitive behavioral):ti (Word variations have been searched)</p> <p>#14 #9 OR #10 OR #11 OR #12 OR #13</p> <p>#15 MeSH descriptor: [Stress Disorders, Post-Traumatic] explode all trees</p> <p>#16 (post-traumatic stress disorder OR PTSD):ti,ab,kw (Word variations have been searched)</p> <p>#17 #15 OR #16</p> <p>#18 #8 AND #14 AND #17</p> |    |
| CINAHL   | <p>1#TI: nurs* OR midwi* OR nurse practitioners OR doctor* OR clinician* OR physician* OR healthcare workers OR healthcare professionals OR healthcare providers OR health personnel OR medical staff OR medical practitioner OR medical care personnel</p> <p>2#TI: intervention* OR program* OR training OR psychoeducation OR mindful* OR resilienc* OR cognitive behavioral</p> <p>3#AB: post-traumatic stress disorder OR PTSD</p> <p>4# 1# AND 2#AND 3#</p>                                                                                                                                       | 37 |
| PsycINFO | <p>1#TI: nurs* OR midwi* OR nurse practitioners OR doctor* OR clinician* OR physician* OR healthcare workers OR healthcare professionals OR healthcare providers OR health personnel OR medical staff OR medical practitioner OR medical care personnel</p>                                                                                                                                                                                                                                                                                                                                             | 41 |

|                |                                                                                                                                                                                                                                                                                                                                                                                                                                                                               |    |
|----------------|-------------------------------------------------------------------------------------------------------------------------------------------------------------------------------------------------------------------------------------------------------------------------------------------------------------------------------------------------------------------------------------------------------------------------------------------------------------------------------|----|
|                | <p>2#TI: intervention* OR program* OR training OR psychoeducation OR mindful* OR resilienc* OR cognitive behavioral</p> <p>3#AB: post-traumatic stress disorder OR PTSD</p> <p>4# 1# AND 2#AND 3#</p>                                                                                                                                                                                                                                                                         |    |
| Web of Science | <p>1# TI: nurs* OR midwi* OR nurse practitioners OR doctor* OR clinician* OR physician* OR healthcare workers OR healthcare professionals OR healthcare providers OR health personnel OR medical staff OR medical practitioner OR medical care personnel</p> <p>2# TI: intervention* OR program* OR training OR psychoeducation OR mindful* OR resilienc* OR cognitive behavioral</p> <p>3#Subject Term: post-traumatic stress disorder OR PTSD</p> <p>4# 1# AND 2#AND 3#</p> | 97 |
| Scopus         | <p>1#TI: nurs* OR midwi* OR nurse practitioners OR doctor* OR clinician* OR physician* OR healthcare workers OR healthcare professionals OR healthcare providers OR health personnel OR medical staff OR medical practitioner OR medical care personnel</p> <p>2#TI: intervention* OR program* OR training OR psychoeducation OR mindful* OR resilienc* OR cognitive behavioral</p> <p>3#AB: post-traumatic stress disorder OR PTSD</p> <p>4# 1# AND 2#AND 3#</p>             | 54 |
| ProQuest       | <p>1#TI: nurs* OR midwi* OR nurse practitioners OR doctor* OR clinician* OR physician* OR healthcare workers OR healthcare professionals OR healthcare providers OR health personnel OR medical staff OR medical</p>                                                                                                                                                                                                                                                          | 50 |

|  |                                                                                                                                                                                                                                                     |  |
|--|-----------------------------------------------------------------------------------------------------------------------------------------------------------------------------------------------------------------------------------------------------|--|
|  | <p>practitioner OR medical care personnel</p> <p>2#TI: intervention* OR program* OR training OR psychoeducation OR mindful* OR resilienc* OR cognitive behavioral</p> <p>3#AB: post-traumatic stress disorder OR PTSD</p> <p>4# 1# AND 2#AND 3#</p> |  |
|--|-----------------------------------------------------------------------------------------------------------------------------------------------------------------------------------------------------------------------------------------------------|--|
