# Supplementary material for: Interventions to reduce post-traumatic stress disorder symptoms in health care professionals from 2011 to 2021: a scoping review
Source: HighWire-hosted journal article supplement (doi:10.1136/bmjopen-2021-058214), 2022-01-01
Supplement: bmjopen-2021-058214supp002_data_supplement.pdf [file bmjopen-2021-058214supp002_data_supplement.pdf]

## Supplementary file 2: Details on interventions for reducing PTSD in health care professionals

| Author & Year (Country)    | Intervention type                 | Content and format                                                                                                                                                                                                                                                                                                                                                               | Duration                                                                                                                                                                                                                                                  | Session     | Frequency                     | Assessment time                                                                               | Results                                                                                                                                                   |
|----------------------------|-----------------------------------|----------------------------------------------------------------------------------------------------------------------------------------------------------------------------------------------------------------------------------------------------------------------------------------------------------------------------------------------------------------------------------|-----------------------------------------------------------------------------------------------------------------------------------------------------------------------------------------------------------------------------------------------------------|-------------|-------------------------------|-----------------------------------------------------------------------------------------------|-----------------------------------------------------------------------------------------------------------------------------------------------------------|
| Bryant, 2019 (Australia)   | Cognitive behaviour therapy       | Prolonged exposure (CBT-L) and brief exposure (CBT-B) comprised one session of psychoeducation, four sessions of cognitive behaviour therapy (CBT) skills training (provided brief instruction in depression management, emotion regulation and so on; a workbook was offered), six sessions that comprised imaginal and in vivo exposure and one session of relapse prevention. | 12 weeks<br>Cognitive restructuring was incorporated into sessions 2 - 11. CBT-L sessions were 90 minutes in duration and comprised 40 minutes of imaginal exposure. CBT-B sessions were 60 minutes in duration and comprised 10 min of imaginal exposure | 12 sessions | 1 session per week            | Pre-treatment, post-treatment and 9-month follow-up (6 months following treatment completion) | This study highlights that CBT, which can include either long or brief imaginal exposure, is efficacious in reducing PTSD in emergency service personnel. |
| Fiol-DeRoque, 2021 (Spain) | A mobile phone-based intervention | An app targeting emotional skills, healthy lifestyle behaviour,                                                                                                                                                                                                                                                                                                                  | 2 weeks                                                                                                                                                                                                                                                   | 5 sessions  | daily prompts (notifications) | Pre-intervention and post-intervention                                                        | Among health care workers consuming                                                                                                                       |

|                     |                                                                   |                                                                                                                                                                                                                                                                                                  |                                                                      |             |                    |                                              |                                                                                                                                                                                         |
|---------------------|-------------------------------------------------------------------|--------------------------------------------------------------------------------------------------------------------------------------------------------------------------------------------------------------------------------------------------------------------------------------------------|----------------------------------------------------------------------|-------------|--------------------|----------------------------------------------|-----------------------------------------------------------------------------------------------------------------------------------------------------------------------------------------|
|                     | based on cognitive-behavioural therapy and mindfulness approaches | burnout, and social support was delivered. Additionally, daily prompts (notifications) included brief questionnaires, followed by short messages offering tailored information according to the participants' responses.                                                                         |                                                                      |             |                    |                                              | psychotropic medications, compared to the control app, the intervention significantly improved symptoms of PTSD.                                                                        |
| Gerhart, 2016 (USA) | An Experiential Provider Training Series (ACCEPTS)                | It is a multimodal program with an emphasis on using mindfulness and communication training. A group format was used. Communication training included directed exercises to engage with peers, express common reactions to patient trauma, and listen to the reactions shared by others. Sitting | 8 weeks<br>-Two half-day sessions: 4 h<br>-Weekly session: 1.5 - 2 h | 10 sessions | 1 session per week | Pre-training, mid-training and post-training | PTSD<br>Re-experiencing (posttreatment $d=-0.34$ , $p<0.01$ ). The results indicated that ACCEPTS is an acceptable and feasible intervention for providers that may enhance well-being. |

|                    |                                                          |                                                                                                                                                                                                                |                                                                                                                                                                                                                                |                                                                                                                                                                        |                                                                                                                                                                                           |  |                                        |                                                                                                                                                                                              |
|--------------------|----------------------------------------------------------|----------------------------------------------------------------------------------------------------------------------------------------------------------------------------------------------------------------|--------------------------------------------------------------------------------------------------------------------------------------------------------------------------------------------------------------------------------|------------------------------------------------------------------------------------------------------------------------------------------------------------------------|-------------------------------------------------------------------------------------------------------------------------------------------------------------------------------------------|--|----------------------------------------|----------------------------------------------------------------------------------------------------------------------------------------------------------------------------------------------|
|                    |                                                          | meditation was the primary mindfulness exercise emphasized during the group.                                                                                                                                   |                                                                                                                                                                                                                                |                                                                                                                                                                        |                                                                                                                                                                                           |  |                                        |                                                                                                                                                                                              |
| Kim, 2012 (Mexico) | Mindfulness-based stretching and deep breathing exercise | The intervention consisted of stretching and balancing movements combined with breathing and a focus on mindfulness.                                                                                           | 8 weeks, 60 minutes each session                                                                                                                                                                                               | 16 sessions                                                                                                                                                            | Semiweekly                                                                                                                                                                                |  | Pre-intervention and post-intervention | The intervention significantly reduced PTSD symptom severity.                                                                                                                                |
| Mealer, 2014 (USA) | Resilience training program                              | The program included a 2-day educational workshop, written exposure sessions, event-triggered counselling sessions, mindfulness-based stress reduction exercises, and a protocolized aerobic exercise regimen. | 12 weeks<br>-Educational workshop: 2 days;<br>-Written exposure:30 minutes/session;<br>-Mindfulness-based stress reduction practices:15 minutes/session;<br>-Exercise:30 to 45 minutes/session<br>-Event-Triggered Counselling | -Educational workshop: 1 session;<br>-Written exposure: 12 sessions;<br>-MBSR Practices: at least 36 sessions;<br>-Exercise: at least 36 sessions;<br>-Event-Triggered | -Educational workshop: 1 time;<br>-Written exposure: 1 time/week;<br>-MBSR Practices: at least 3 times per week;<br>-Exercise: at least 3 times per week;<br>-Event-Triggered Counselling |  | Pre-intervention and post-intervention | This multimodal resilience training program was feasible to conduct and acceptable to ICU nurses. A significant decrease in PTSD symptom score after the intervention was observed (p=0.02). |

|                       |                                                        |                                                                                                                                                   | Session: 30 to 60 minutes/session | Counselling Session: at least 1 session | Session: 1 session/week |                                |                                                                                                                                                                                 |
|-----------------------|--------------------------------------------------------|---------------------------------------------------------------------------------------------------------------------------------------------------|-----------------------------------|-----------------------------------------|-------------------------|--------------------------------|---------------------------------------------------------------------------------------------------------------------------------------------------------------------------------|
| Rippstein, 2017 (USA) | Online three good things intervention.                 | Participants were asked to report three things that went well today and their role in bringing them about.                                        | 2 weeks                           | 14 sessions                             | Daily                   | /                              | The Three Good Things exercise acknowledges the importance of self-care in health care workers and appears to promote well-being, which might ultimately strengthen resilience. |
| Slade, 2018 (UK)      | <b>Program</b> for the prevention of PTSD in midwifery | The program included 3 parts:<br>(1) Workshop: support midwives' understanding of trauma experiences and providing guidance on managing feelings; | 6 months                          | Not report                              | Not report              | Pre-training and post-training | There was a trend towards reduced levels of PTSD symptomatology, and fewer midwives reported                                                                                    |

|                     |               |                                                                                                                                                                                                                                                 |          |            |            |   |                                                                                                                              |
|---------------------|---------------|-------------------------------------------------------------------------------------------------------------------------------------------------------------------------------------------------------------------------------------------------|----------|------------|------------|---|------------------------------------------------------------------------------------------------------------------------------|
|                     |               | (2) Peer support: offer opportunity to receive confidential support over the telephone from a midwife peer;<br>(3) Referral and access to psychological assessment and input: contact a clinical psychologist to receive assessment when needed |          |            |            |   | subclinical levels of PTSD (from 10% at T1 to 7% at T2)                                                                      |
| Slade, 2020<br>(UK) | Same as above | Same as above                                                                                                                                                                                                                                   | 12 weeks | Not report | Not report | / | The program was viewed as highly acceptable and feasible. Midwives and their managers strongly supported its implementation. |

**Notes:** ACCEPTS: An Experiential Provider Training Series; CBT: Cognitive behaviour therapy; CBT-L: Prolonged exposure; CBT-B: brief exposure.
