# Supplementary material for: Interventions to reduce post-traumatic stress disorder symptoms in health care professionals from 2011 to 2021: a scoping review
Source: HighWire-hosted journal article supplement (doi:10.1136/bmjopen-2021-058214), 2022-01-01
Supplement: bmjopen-2021-058214supp003_data_supplement.pdf [file bmjopen-2021-058214supp003_data_supplement.pdf]

**Supplementary file 3** Overall characteristics of the interventions

| <b>Variable</b>        | <b>Component</b>                                    | <b>Intervention count</b>                                                                                                     |
|------------------------|-----------------------------------------------------|-------------------------------------------------------------------------------------------------------------------------------|
| <b>Types</b>           | Cognitive behaviour therapy                         | (Bryant et al., 2019; Fiol-DeRoque et al., 2021)                                                                              |
|                        | Mindfulness-based interventions                     | (Gerhart et al., 2016; Kim & Burge, 2012)                                                                                     |
|                        | Comprehensive programmes                            |                                                                                                                               |
| <b>Contents</b>        | Three good things intervention                      | (Rippstein-Leuenberger et al., 2017)                                                                                          |
|                        | Trauma-related knowledge                            | (Bryant et al., 2019; Mealer et al., 2014; Slade et al., 2018, 2020)                                                          |
|                        | Emotion regulation and relaxation skill training    | (Fiol-DeRoque et al., 2021; Gerhart et al., 2016; Kim & Burge, 2012; Mealer et al., 2014; Rippstein-Leuenberger et al., 2017) |
| <b>Formats</b>         | Psychological support from peers and psychologists  | (Gerhart et al., 2016; Slade et al., 2018, 2020)                                                                              |
|                        | Online                                              | (Fiol-DeRoque et al., 2021; Rippstein-Leuenberger et al., 2017)                                                               |
|                        | Offline                                             | (Bryant et al., 2019; Gerhart et al., 2016; Kim & Burge, 2012; Mealer et al., 2014; Slade et al., 2018, 2020)                 |
| <b>Duration</b>        | 2 weeks                                             | (Fiol-DeRoque et al., 2021; Rippstein-Leuenberger et al., 2017)                                                               |
|                        | 8 weeks                                             | (Gerhart et al., 2016; Kim & Burge, 2012)                                                                                     |
|                        | 12 weeks                                            | (Bryant et al., 2019; Mealer et al., 2014)                                                                                    |
|                        | 6-month                                             | (Slade et al., 2018, 2020)                                                                                                    |
| <b>Assessment time</b> | Pre-intervention and post-intervention              | (Fiol-DeRoque et al., 2021; Kim & Burge, 2012; Mealer et al., 2014; Slade et al., 2018)                                       |
|                        | Pre-training, mid-training and post-training        | (Gerhart et al., 2016)                                                                                                        |
|                        | Pre-treatment, post-treatment and 9-month follow-up | (Bryant et al., 2019)                                                                                                         |
